# Supplementary material for: Carbon-mediated photoinduced reactions as a key factor in the photocatalytic performance of C/TiO2
Source: Royal Society of Chemistry journal article supplement (doi:10.1039/c2cy20270k), 2012-01-01

## Supporting Information

### Carbon mediated photoinduced reactions as a key factor in the photocatalytic performance of C/TiO<sub>2</sub>

Marta Haro, Leticia F. Velasco, Conchi O. Ania\*

Instituto Nacional del Carbón, INCAR-CSIC, Apdo. 73, 33080 Oviedo, Spain

E-mail: [conchi.ania@incar.csic.es](mailto:conchi.ania@incar.csic.es)

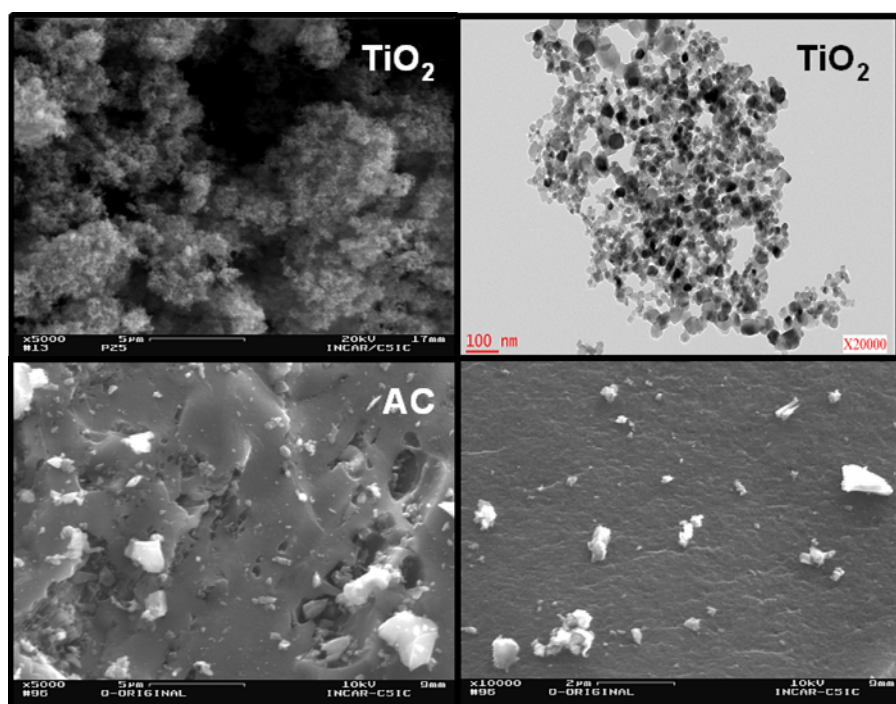

**Figure S1.** TEM (top right) and SEM images of the materials (activated carbon and TiO<sub>2</sub>) used for the preparation of the composites.

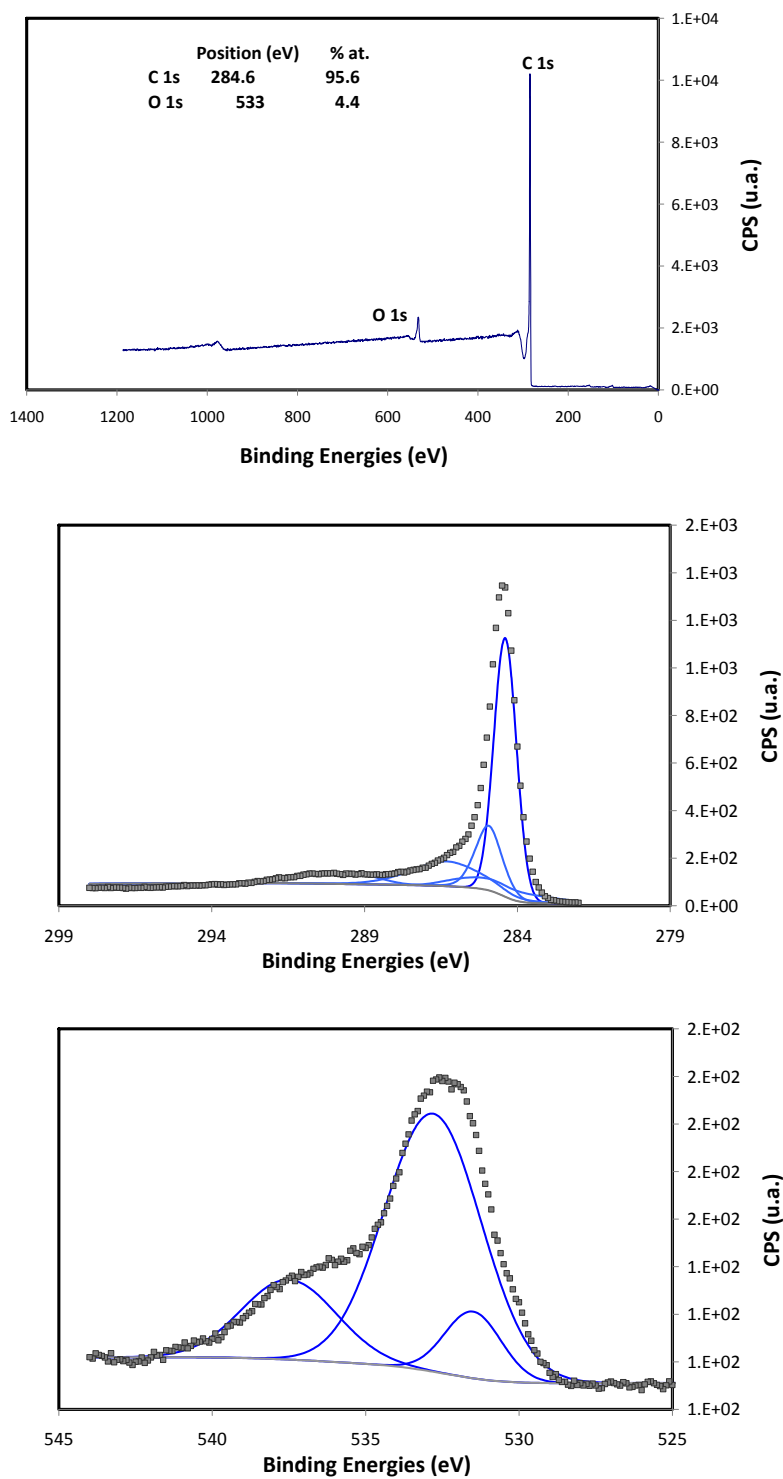

**Figure S2.** XPS data of the activated carbon used as support. A) wide scan; B) C1s and C) O1s signals, showing deconvolution of main components.

**Figure S3.** Images obtained at the confocal optical microscope of the film electrodes. Dark areas indicate the presence of thicker regions (islands) upon incorporation of the carbon additive.

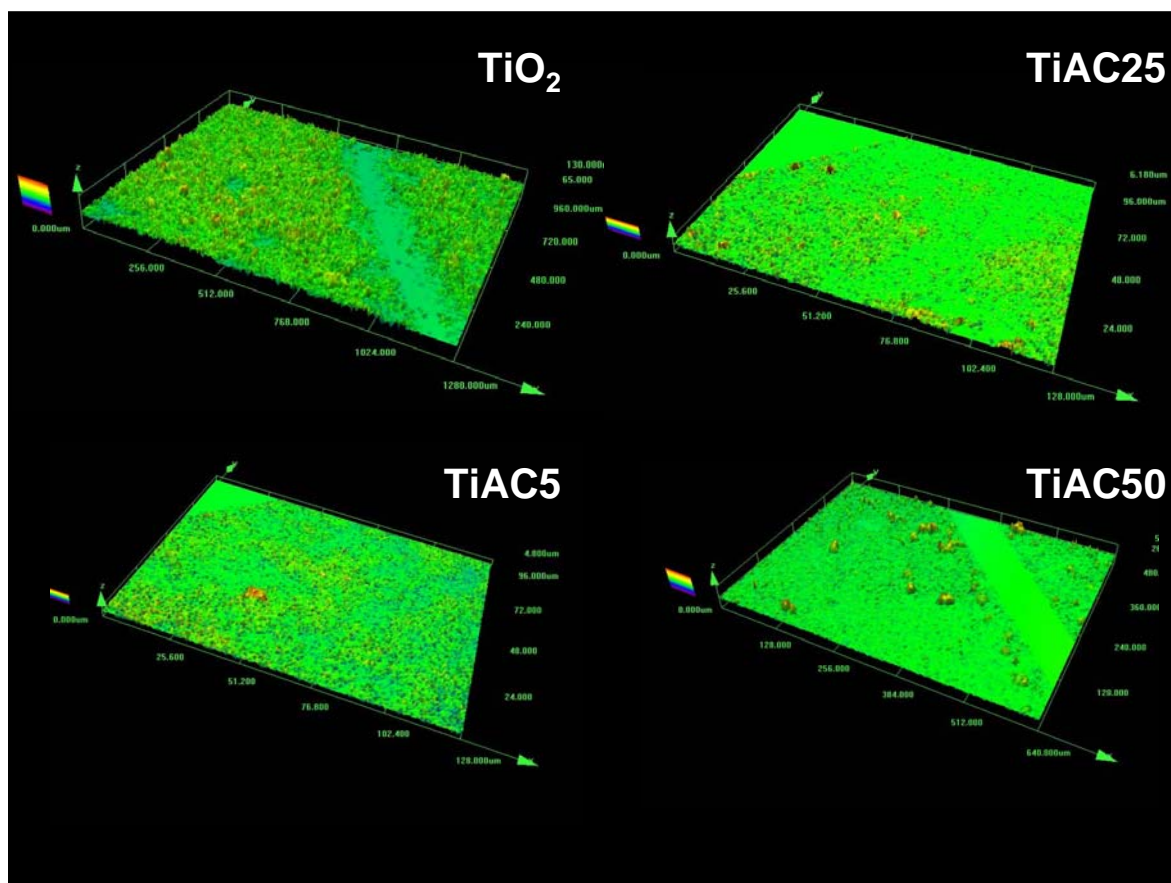

Supplement: c2cy20270k.pdf [file c2cy20270k.pdf]
